# Supplementary material for: Taxonomic relevance of petiole anatomical and micro-morphological characteristics of Clematis L. (Ranunculaceae) taxa from South Korea
Source: PeerJ. 2021 Jun 29;9:e11669. doi: 10.7717/peerj.11669 (PMC8253109; doi:10.7717/peerj.11669)
Supplement: Supplemental Information 1 [file peerj-09-11669-s001.csv]

Taxon	PS	TT	GT	TA	PO	UW	UG	PF	SC	MV	IV	VB	VG
C. apiifolia	2	1	1	3	2	1	0,1	1	0	2	0	0	1
C. brevicaudata	2	1	1	2	1	1	1	2	2	1	1	1	2
C. trichotoma	1	2	1	2	1	1	1	2	1	1	1	1	2
C. taeguensis	0,1	0,2	1	1	2	0	1	2	2	2	2	2	1
C. hexapetala	0	0	0	0	1,2	0	3	1	0	1	0	0	0
C. terniflora	1	2	1	1	0	1	0,1	0	0	2	0	0	1
C. terniflora var. mandshurica	1	2	1	1	2	0	1	2	2	2	2	2	1
C. urticifolia	2	1	1	3	2	0	1	2	1	1	3	3	4
C. heracleifolia	2	1	1	3	1	1	1	2	0	2	3	3	3
C. takedana	2	1	1	3	2	0	1	1	1	2	3	3	3
C. patens	1	2	1	2	1	1	0	1	2	0	1	0	1
C. brachyura	1	2	1	2	2	0	3	1	0	1	2	2	2
C. serratifolia	0,1	0,2	0	1	1,2	0	1,2	2	1	1	1	1	1
C. fusca var. fusca	1	2	1	1	2	0	2	2	0	1	1	1	2
C. fusca var. flabellata	1	2	1	2	1	0	2	0	0	1	2	2	3
C. fusca var. violacea	1	2	1	1	1	0	1	2	0	1	1	1	2
C. calcicola	1	2	0	1	1	0,1	1,2	1	0	1	2	2	2
C. koreana	1	2	1	2	1	0	3	0	0	1	1	1	2
C. ochotensis	1	2	1	2	1	0	2	1	0	1	0	0	0
